# Supplementary material
Source: MDPI journal article supplement (https://www.mdpi.com/2079-6412/13/7/1193)
Supplement: s1 [file s1]

# Hybrid Materials Based on ZnO Nanoparticles and Organo-Modified Silica Coatings as Eco-Friendly Anticorrosive Protection for Metallic Historic Artifacts

Mihaela Ioan <sup>1</sup>, Dan Florin Anghel <sup>1</sup>, Mihai Anastasescu <sup>1</sup>, Ioana Catalina Gifu <sup>2</sup>, Elvira Alexandrescu <sup>2</sup>, Roxana Ioana Matei <sup>2,3</sup>, Cristian Petcu <sup>2,\*</sup>, Ioana Stanculescu <sup>4,5</sup>, Georgiana Alexandra Sanda <sup>5</sup>, Daniela Bala <sup>5</sup> and Ludmila Otilia Cinteza <sup>5,\*</sup>

<sup>1</sup> “Ilie Murgulescu” Institute of Physical Chemistry, Romanian Academy, 202Spl. Independentei, 060021 Bucharest, Romania

<sup>2</sup> Polymer Department, National Institute for Research and Development in Chemistry and Petrochemistry—ICECHIM, 202 Spl. Independentei, 060021 Bucharest, Romania

<sup>3</sup> Faculty of Chemical Engineering and Biotechnologies, University “Politehnica” of Bucharest, 060042 Bucharest, Romania

<sup>4</sup> Horia Hulubei National Institute for Physics and Nuclear Engineering, IRASM Department, 30 Reactorului Str., 077125 Magurele, Romania

<sup>5</sup> Physical Chemistry Department, University of Bucharest, 4–12 Blv. Regina Elisabeta, 030018 Bucharest, Romania

\* Correspondence: cpetcu@icf.ro (C.P.); ocinteza@gw-chimie.math.unibuc.ro (L.O.C.)

| Sample | Coating                                                                             | Sample | Coating                                                                              | Sample | Coating                                                                               |
|--------|-------------------------------------------------------------------------------------|--------|--------------------------------------------------------------------------------------|--------|---------------------------------------------------------------------------------------|
| M1     |  | M2     |  | P9     |  |
| P1     |  | P6     |  | P10    |  |
| P2     |  | P7     |  | P11    |  |
| P3     |  | P8     |  | P12    |  |
| P4     |  | -      | -                                                                                    | P13    |  |
| -      | -                                                                                   | -      | -                                                                                    | P14    |  |
| -      | -                                                                                   | -      | -                                                                                    | P9     |  |
| -      | -                                                                                   | -      | -                                                                                    | P10    |  |

**Figure S1.** Optical images of Incralac-based and silica-based coatings.

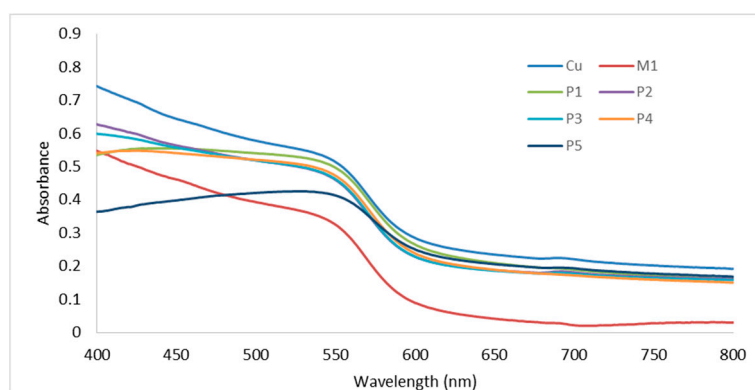

(a)

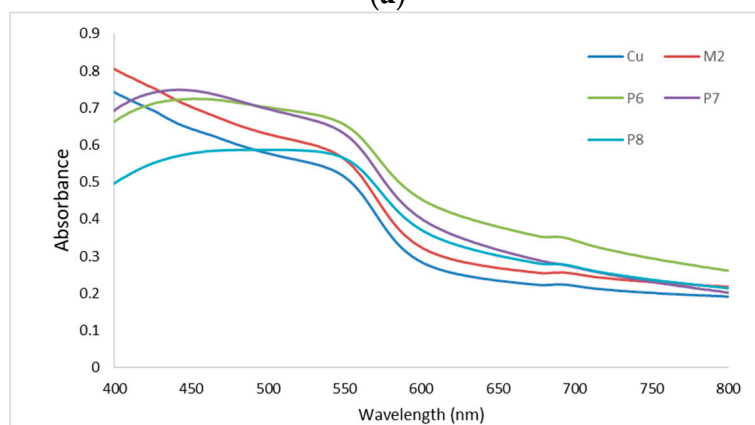

(b)

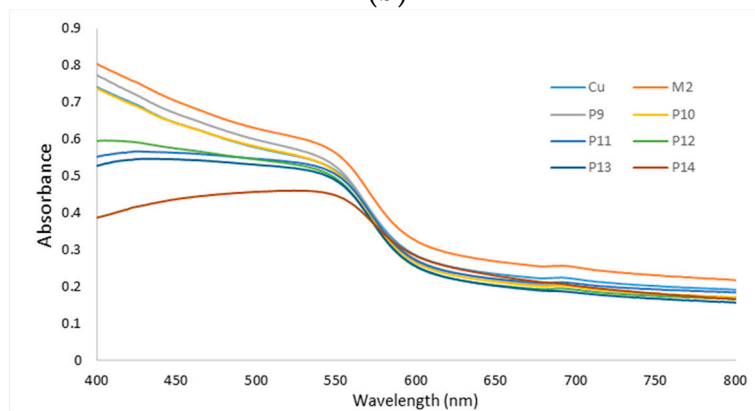

(c)

**Figure S2.** Diffuse reflectance spectra of Incralac-based and silica-based coatings with various compositions.

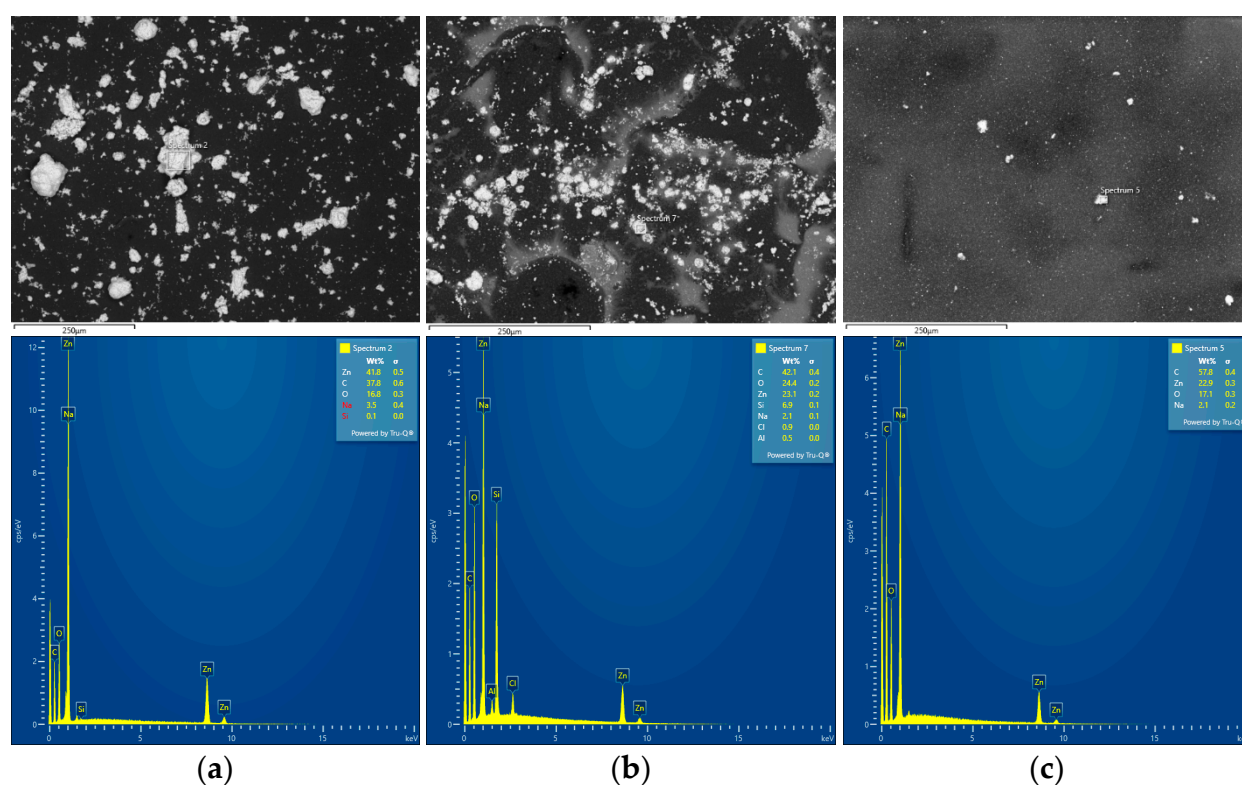

**Figure S3.** SEM images and EDX analysis for (a) ZnO nanopowder; (b) ZnO containing Incralac coating (sample P5) and (c) ZnO and BTA containing silica coating (sample P14).

**Table S1.** The chromatic coordinates  $\Delta E^*$ ,  $L^*$ ,  $a^*$  and  $b^*$  determined for Incralac-based and silica-based coatings with various compositions.

| Sample | $\Delta E^*_{ab}$ | $\Delta L^*$     | $\Delta a^*$     | $\Delta b^*$      |
|--------|-------------------|------------------|------------------|-------------------|
| M1     | $2.32 \pm 0.06$   | $-0.80 \pm 1.01$ | $1.69 \pm 0.73$  | $0.97 \pm 0.58$   |
| P1     | $2.44 \pm 0.39$   | $-0.85 \pm 0$    | $1.76 \pm 0$     | $0.92 \pm 0$      |
| P2     | $2.46 \pm 0.19$   | $0.92 \pm 0.91$  | $2.19 \pm 0.16$  | $0.08 \pm 0.06$   |
| P3     | $3.67 \pm 0.12$   | $1.42 \pm 0.21$  | $3.21 \pm 0.02$  | $1.03 \pm 0.09$   |
| P4     | $6.13 \pm 0.29$   | $-3.4 \pm 0$     | $4.09 \pm 0$     | $-2.61 \pm 0$     |
| P5     | $12.54 \pm 1.42$  | $-1.29 \pm 1.55$ | $0.21 \pm 1.75$  | $-12.35 \pm 1.63$ |
| M2     | $8.13 \pm 0.21$   | $-7.03 \pm 0.24$ | $1.92 \pm 0.09$  | $3.60 \pm 0.07$   |
| P6     | $9.80 \pm 0.19$   | $-6.58 \pm 0.28$ | $-0.92 \pm 0.09$ | $-7.19 \pm 0.50$  |
| P7     | $8.26 \pm 1.17$   | $-7.57 \pm 1.33$ | $1.09 \pm 0.50$  | $-3.06 \pm 0.04$  |
| P8     | $9.16 \pm 0.16$   | $-3.13 \pm 0.49$ | $1.72 \pm 0$     | $-8.43 \pm 0.01$  |
| P9     | $6.14 \pm 0.24$   | $-0.48 \pm 0.07$ | $3.08 \pm 0.05$  | $5.29 \pm 0.31$   |
| P10    | $3.20 \pm 0.33$   | $-0.74 \pm 0.05$ | $1.90 \pm 0.11$  | $2.45 \pm 0.50$   |
| P11    | $5.09 \pm 0.43$   | $-1.84 \pm 0.16$ | $3.26 \pm 0.10$  | $-3.44 \pm 0.46$  |
| P12    | $7.51 \pm 0.70$   | $5.99 \pm 0.61$  | $1.17 \pm 0.07$  | $-4.37 \pm 0.35$  |
| P13    | $6.48 \pm 0.28$   | $-3.62 \pm 0.41$ | $3.66 \pm 0.02$  | $-3.92 \pm 0.12$  |
| P14    | $16.33 \pm 0.40$  | $-1.76 \pm 0.29$ | $-0.66 \pm 0.72$ | $-16.22 \pm 0.41$ |

**Table S2.** LSV and corrosion parameters (from Tafel) for bare and coated copper in 3.5% NaCl.

| Sample | $R_p$<br>( $\Omega$ ) | $-E_{corr}$<br>(mV) | $I_{corr}$<br>( $\mu A/cm^2$ ) |
|--------|-----------------------|---------------------|--------------------------------|
| Cu     | 844.5                 | 332                 | 21.52                          |
| M1     | 2976.0                | 297                 | 4.754                          |
| M2     | 1041.0                | 294                 | 10.800                         |
| P1     | 2104.0                | 280                 | 4.011                          |
| P2     | 1264                  | 267                 | 2.362                          |
| P3     | 3149.0                | 257                 | 2.259                          |
| P4     | 3230.0                | 289                 | 3.860                          |
| P5     | 2351.0                | 284                 | 3.015                          |
| P6     | 372.5                 | 287                 | 11.72                          |
| P7     | 927.0                 | 273                 | 13.320                         |
| P8     | 885.4                 | 268                 | 4.918                          |
| P9     | 1100.0                | 277                 | 7.643                          |
| P10    | 982.9                 | 283                 | 7.193                          |
| P11    | 1364.0                | 280                 | 5.844                          |
| P12    | 1573                  | 282                 | 3.823                          |
| P13    | 627.9                 | 264                 | 4.673                          |
| P14    | 1108                  | 270                 | 5.553                          |
